# Supplementary material
Source: Research Square preprint supplement (doi:10.21203/rs.3.rs-9519164/v1)
Supplement: Supplementary file 2 [file 62edb8929f867cc51b3541c5.docx]

**Table 3** Comparative statistical summary of altmetric indicators in the full OpenAlex corpus (n = 8,493 publications)


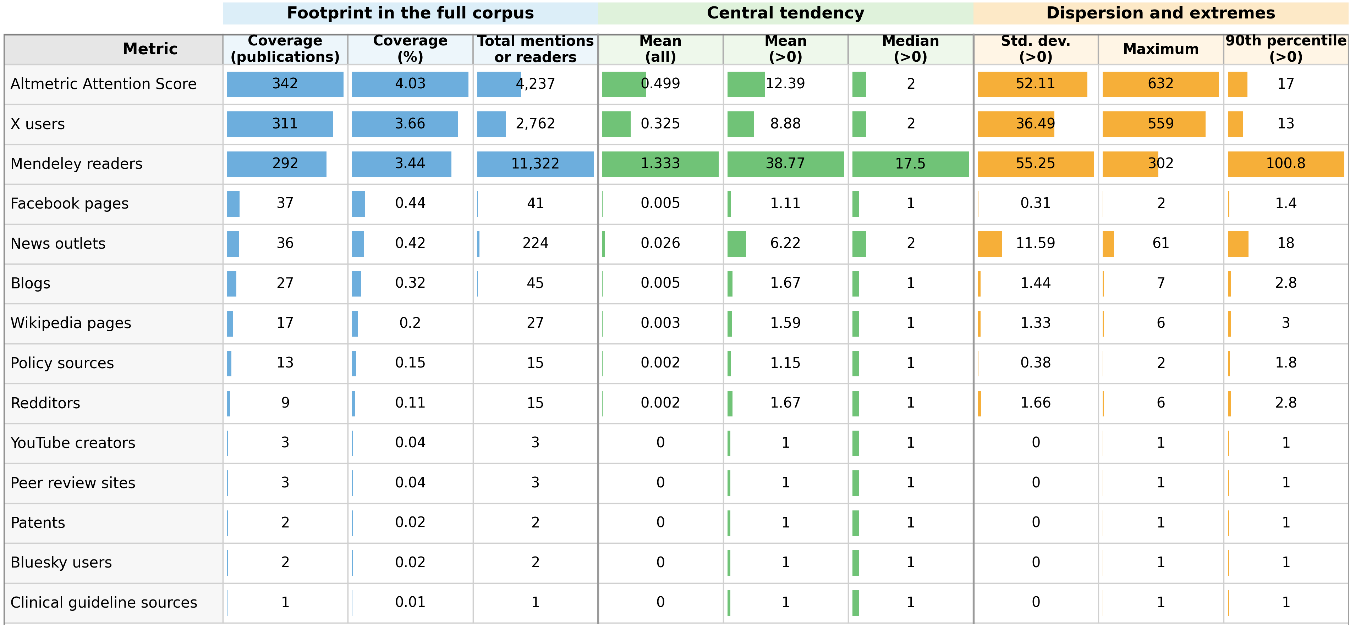


**Table 4** Open access pathways and differentiated patterns of visibility and citation in the subset with DOIs


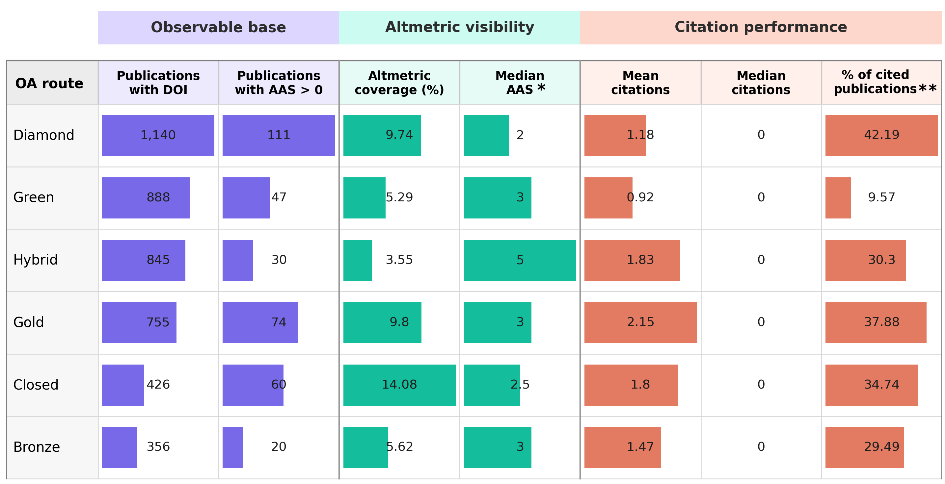


*****The median AAS was calculated only for publications with AAS > 0.

******This indicator is included because the median number of citations was 0 across all pathways, which limits its discriminatory capacity when considered in isolation.
